# Supplementary material
Source: PubMed Central journal article supplement (PMC2230692)

**A**

Gene Loss Candidates (human: err, dog: valid)

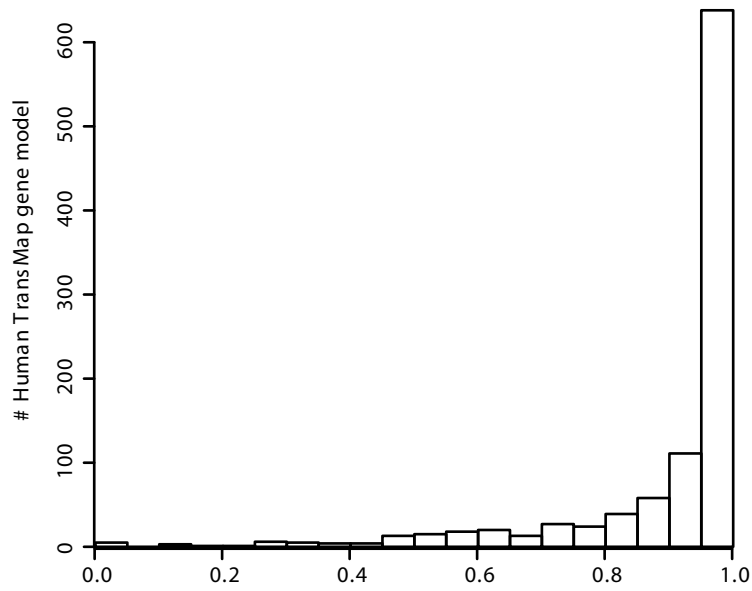**B**

human: valid, dog: valid

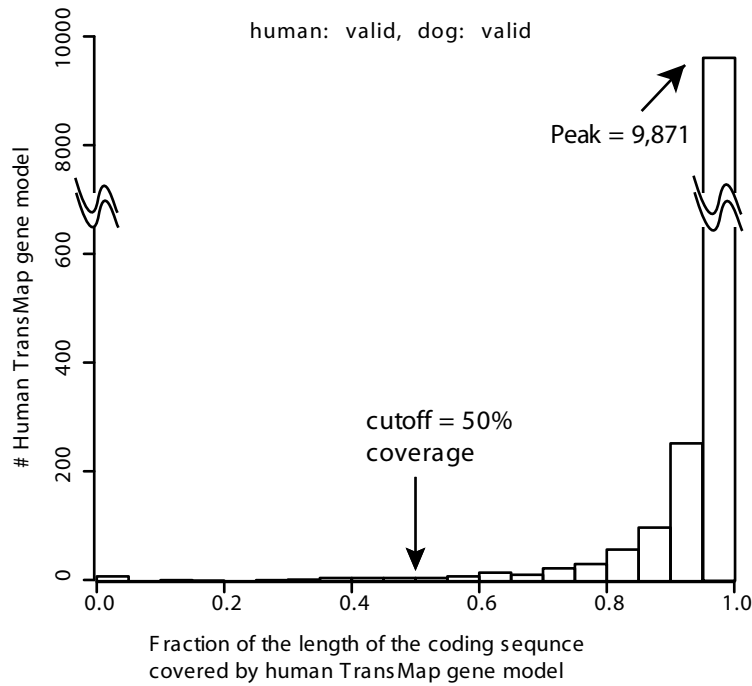

Supplement: pcbi.0030247.sg001.pdf [file pcbi.0030247.sg001.pdf]
